# Supplementary material for: Decorin: a potential therapeutic candidate for ligamentum flavum hypertrophy by antagonizing TGF-β1
Source: PubMed Central journal article supplement (PMC10394053; doi:10.1038/s12276-023-01023-y), 2023-07-03
Supplement: 12276_2023_1023_MOESM1_ESM.pdf [file 12276_2023_1023_MOESM1_ESM.pdf]

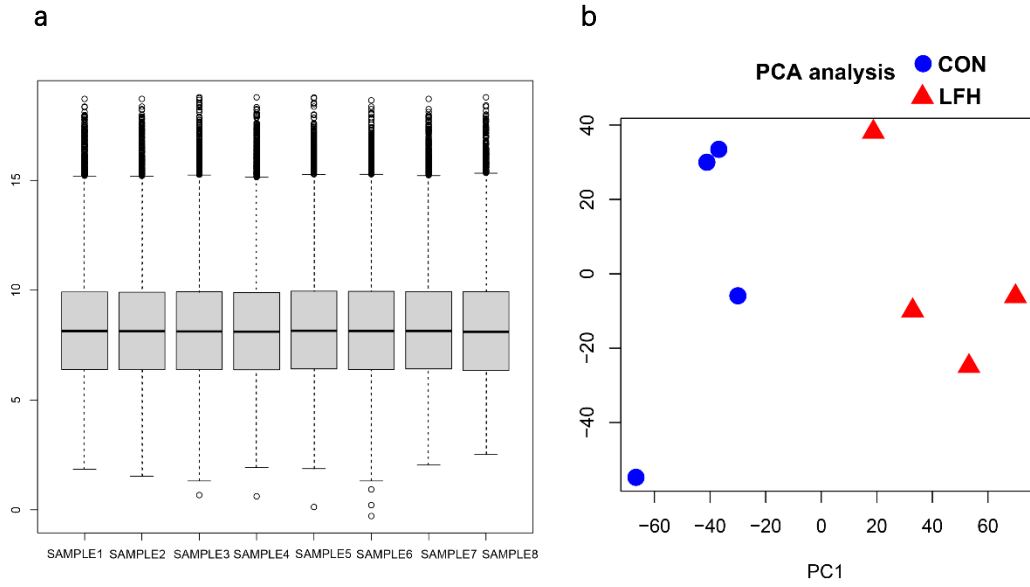

**Supplementary Fig. 1.** (a) Quality control of the raw data. Boxplot represented that the batch effect had been removed. (b) Samples from normal people or LFH patients could be distinguished according to PCA analysis.
